# Supplementary material for: Salivary and plasmatic oxytocin are not reliable trait markers of the physiology of the oxytocin system in humans
Source: eLife. 2020 Dec 11;9:e62456. doi: 10.7554/eLife.62456 (PMC7732341; doi:10.7554/eLife.62456)
Supplement: Source data 1. [file elife-62456-data1.xlsx]

## Sheet: Plasma
Concentration	Session	Condition	ID	Sample_number	Time
1.12	B	IN	1	1	Baseline
1.12	C	IV	1	1	Baseline
0.57	D	NB	1	1	Baseline
0.28	E	PL	1	1	Baseline
1.29	B	IV	2	1	Baseline
0.77	C	PL	2	1	Baseline
0.45	D	IN	2	1	Baseline
1.89	E	NB	2	1	Baseline
0.32	B	IN	3	1	Baseline
1.14	C	IV	3	1	Baseline
0.41	D	NB	3	1	Baseline
0.56	E	PL	3	1	Baseline
0.22	B	PL	4	1	Baseline
0.2	C	NB	4	1	Baseline
0.2	D	IV	4	1	Baseline
0.83	E	IN	4	1	Baseline
0.2	B	IV	5	1	Baseline
0.2	C	PL	5	1	Baseline
0.21	D	IN	5	1	Baseline
0.55	B	PL	6	1	Baseline
0.2	C	NB	6	1	Baseline
0.99	D	IV	6	1	Baseline
0.35	E	IN	6	1	Baseline
0.2	B	NB	7	1	Baseline
0.23	C	IN	7	1	Baseline
0.2	D	PL	7	1	Baseline
0.2	E	IV	7	1	Baseline
0.2	B	NB	8	1	Baseline
0.24	C	IN	8	1	Baseline
0.21	D	PL	8	1	Baseline
0.2	E	IV	8	1	Baseline
0.29	B	IV	9	1	Baseline
0.2	C	PL	9	1	Baseline
0.2	D	IN	9	1	Baseline
0.85	E	NB	9	1	Baseline
19.73	B	NB	10	1	Baseline
0.2	C	IN	10	1	Baseline
1.36	D	PL	10	1	Baseline
0.9	E	IV	10	1	Baseline
0.2	B	NB	11	1	Baseline
0.24	C	IN	11	1	Baseline
0.41	D	PL	11	1	Baseline
0.2	E	IV	11	1	Baseline
1.21	B	IV	12	1	Baseline
1.48	C	PL	12	1	Baseline
.	D	IN	12	1	Baseline
0.83	E	NB	12	1	Baseline
0.37	B	IN	13	1	Baseline
0.2	C	IV	13	1	Baseline
.	D	NB	13	1	Baseline
0.2	E	PL	13	1	Baseline
0.47	B	IN	14	1	Baseline
0.22	C	IV	14	1	Baseline
0.21	D	NB	14	1	Baseline
3.31	E	PL	14	1	Baseline
0.44	B	PL	15	1	Baseline
2.62	C	NB	15	1	Baseline
2.32	D	IV	15	1	Baseline
2.36	E	IN	15	1	Baseline
2.21	B	PL	16	1	Baseline
0.21	C	NB	16	1	Baseline
0.55	D	IV	16	1	Baseline
0.2	E	IN	16	1	Baseline
0.2	B	NB	17	1	Baseline
0.33	C	IN	17	1	Baseline
0.2	D	PL	17	1	Baseline
0.2	E	IV	17	1	Baseline
28.96	B	IN	1	8	Post
25.32	D	IN	2	8	Post
14.89	B	IN	3	8	Post
44.92	E	IN	4	8	Post
6.16	D	IN	5	8	Post
9.46	E	IN	6	8	Post
0.77	C	IN	7	8	Post
10.2	C	IN	8	8	Post
9	D	IN	9	8	Post
6.03	C	IN	10	8	Post
15.42	C	IN	11	8	Post
.	D	IN	12	8	Post
25.23	B	IN	13	8	Post
5.08	B	IN	14	8	Post
29.51	E	IN	15	8	Post
5.86	E	IN	16	8	Post
57.13	C	IN	17	8	Post
0.95	C	IV	1	8	Post
1.23	B	IV	2	8	Post
0.41	C	IV	3	8	Post
0.2	D	IV	4	8	Post
0.2	B	IV	5	8	Post
0.21	D	IV	6	8	Post
0.2	E	IV	7	8	Post
0.81	E	IV	8	8	Post
0.22	B	IV	9	8	Post
1.25	E	IV	10	8	Post
0.59	E	IV	11	8	Post
4.11	B	IV	12	8	Post
1.2	C	IV	13	8	Post
0.21	C	IV	14	8	Post
1.41	D	IV	15	8	Post
0.93	D	IV	16	8	Post
0.48	E	IV	17	8	Post
12.79	D	NB	1	8	Post
13.01	E	NB	2	8	Post
43.47	D	NB	3	8	Post
27.93	C	NB	4	8	Post
14.02	C	NB	6	8	Post
9.93	B	NB	7	8	Post
28.1	B	NB	8	8	Post
5.03	E	NB	9	8	Post
18.13	B	NB	10	8	Post
18.41	B	NB	11	8	Post
11.68	E	NB	12	8	Post
.	D	NB	13	8	Post
24.74	D	NB	14	8	Post
49.26	C	NB	15	8	Post
27.09	C	NB	16	8	Post
23.65	B	NB	17	8	Post
4.67	E	PL	1	8	Post
2.74	C	PL	2	8	Post
1.17	E	PL	3	8	Post
0.2	B	PL	4	8	Post
0.22	C	PL	5	8	Post
0.2	B	PL	6	8	Post
0.2	D	PL	7	8	Post
0.81	D	PL	8	8	Post
0.2	C	PL	9	8	Post
1.02	D	PL	10	8	Post
0.2	D	PL	11	8	Post
1.69	C	PL	12	8	Post
0.62	E	PL	13	8	Post
2.18	E	PL	14	8	Post
0.72	B	PL	15	8	Post
2.17	B	PL	16	8	Post
0.2	D	PL	17	8	Post

## Sheet: Saliva
Concentration	Session	Condition	ID	Sample_number	Time
1.12	B	IN	1	1	Baseline
1.12	C	IV	1	1	Baseline
0.57	D	NB	1	1	Baseline
0.28	E	PL	1	1	Baseline
1.29	B	IV	2	1	Baseline
0.77	C	PL	2	1	Baseline
0.45	D	IN	2	1	Baseline
1.89	E	NB	2	1	Baseline
0.32	B	IN	3	1	Baseline
1.14	C	IV	3	1	Baseline
0.41	D	NB	3	1	Baseline
0.56	E	PL	3	1	Baseline
0.22	B	PL	4	1	Baseline
0.2	C	NB	4	1	Baseline
0.2	D	IV	4	1	Baseline
0.83	E	IN	4	1	Baseline
0.2	B	IV	5	1	Baseline
0.2	C	PL	5	1	Baseline
0.21	D	IN	5	1	Baseline
0.55	B	PL	6	1	Baseline
0.2	C	NB	6	1	Baseline
0.99	D	IV	6	1	Baseline
0.35	E	IN	6	1	Baseline
0.2	B	NB	7	1	Baseline
0.23	C	IN	7	1	Baseline
0.2	D	PL	7	1	Baseline
0.2	E	IV	7	1	Baseline
0.2	B	NB	8	1	Baseline
0.24	C	IN	8	1	Baseline
0.21	D	PL	8	1	Baseline
0.2	E	IV	8	1	Baseline
0.29	B	IV	9	1	Baseline
0.2	C	PL	9	1	Baseline
0.2	D	IN	9	1	Baseline
0.85	E	NB	9	1	Baseline
19.73	B	NB	10	1	Baseline
0.2	C	IN	10	1	Baseline
1.36	D	PL	10	1	Baseline
0.9	E	IV	10	1	Baseline
0.2	B	NB	11	1	Baseline
0.24	C	IN	11	1	Baseline
0.41	D	PL	11	1	Baseline
0.2	E	IV	11	1	Baseline
1.21	B	IV	12	1	Baseline
1.48	C	PL	12	1	Baseline
.	D	IN	12	1	Baseline
0.83	E	NB	12	1	Baseline
0.37	B	IN	13	1	Baseline
0.2	C	IV	13	1	Baseline
.	D	NB	13	1	Baseline
0.2	E	PL	13	1	Baseline
0.47	B	IN	14	1	Baseline
0.22	C	IV	14	1	Baseline
0.21	D	NB	14	1	Baseline
3.31	E	PL	14	1	Baseline
0.44	B	PL	15	1	Baseline
2.62	C	NB	15	1	Baseline
2.32	D	IV	15	1	Baseline
2.36	E	IN	15	1	Baseline
2.21	B	PL	16	1	Baseline
0.21	C	NB	16	1	Baseline
0.55	D	IV	16	1	Baseline
0.2	E	IN	16	1	Baseline
0.2	B	NB	17	1	Baseline
0.33	C	IN	17	1	Baseline
0.2	D	PL	17	1	Baseline
0.2	E	IV	17	1	Baseline
28.96	B	IN	1	8	Post
0.95	C	IV	1	8	Post
12.79	D	NB	1	8	Post
4.67	E	PL	1	8	Post
1.23	B	IV	2	8	Post
2.74	C	PL	2	8	Post
25.32	D	IN	2	8	Post
13.01	E	NB	2	8	Post
14.89	B	IN	3	8	Post
0.41	C	IV	3	8	Post
43.47	D	NB	3	8	Post
1.17	E	PL	3	8	Post
0.2	B	PL	4	8	Post
27.93	C	NB	4	8	Post
0.2	D	IV	4	8	Post
44.92	E	IN	4	8	Post
0.2	B	IV	5	8	Post
0.22	C	PL	5	8	Post
6.16	D	IN	5	8	Post
0.2	B	PL	6	8	Post
14.02	C	NB	6	8	Post
0.21	D	IV	6	8	Post
9.46	E	IN	6	8	Post
9.93	B	NB	7	8	Post
0.77	C	IN	7	8	Post
0.2	D	PL	7	8	Post
0.2	E	IV	7	8	Post
28.1	B	NB	8	8	Post
10.2	C	IN	8	8	Post
0.81	D	PL	8	8	Post
0.81	E	IV	8	8	Post
0.22	B	IV	9	8	Post
0.2	C	PL	9	8	Post
9	D	IN	9	8	Post
5.03	E	NB	9	8	Post
18.13	B	NB	10	8	Post
6.03	C	IN	10	8	Post
1.02	D	PL	10	8	Post
1.25	E	IV	10	8	Post
18.41	B	NB	11	8	Post
15.42	C	IN	11	8	Post
0.2	D	PL	11	8	Post
0.59	E	IV	11	8	Post
4.11	B	IV	12	8	Post
1.69	C	PL	12	8	Post
.	D	IN	12	8	Post
11.68	E	NB	12	8	Post
25.23	B	IN	13	8	Post
1.2	C	IV	13	8	Post
.	D	NB	13	8	Post
0.62	E	PL	13	8	Post
5.08	B	IN	14	8	Post
0.21	C	IV	14	8	Post
24.74	D	NB	14	8	Post
2.18	E	PL	14	8	Post
0.72	B	PL	15	8	Post
49.26	C	NB	15	8	Post
1.41	D	IV	15	8	Post
29.51	E	IN	15	8	Post
2.17	B	PL	16	8	Post
27.09	C	NB	16	8	Post
0.93	D	IV	16	8	Post
5.86	E	IN	16	8	Post
23.65	B	NB	17	8	Post
57.13	C	IN	17	8	Post
0.2	D	PL	17	8	Post
0.48	E	IV	17	8	Post
